# Supplementary material for: Surface and interface engineering of CoNi layered double hydroxides for efficient methanol oxidation reaction
Source: Royal Society of Chemistry journal article supplement (doi:10.1039/c7ra07867f), 2017-01-01
Supplement: c7ra07867f1.pdf [file c7ra07867f1.pdf]

## Supporting Information

### Surface and interface engineering of CoNi layered double hydroxides for efficient methanol oxidation reaction

Shuli Luo<sup>a</sup>, Lei Qian <sup>a\*</sup>, Menglong Liao<sup>a</sup>, Xiaorong Hu<sup>a\*</sup>, Dan Xiao<sup>b</sup>

\* Corresponding authors. qianlei13@cdut.cn; huxiaorong@cdut. cn

<sup>a</sup>. College of Materials and Chemistry & Chemical Engineering, Chengdu University of Technology, Chengdu, Sichuan, 610059, China.

<sup>b</sup>. College of Chemistry, Sichuan University, Chengdu, Sichuan, 610064, China.

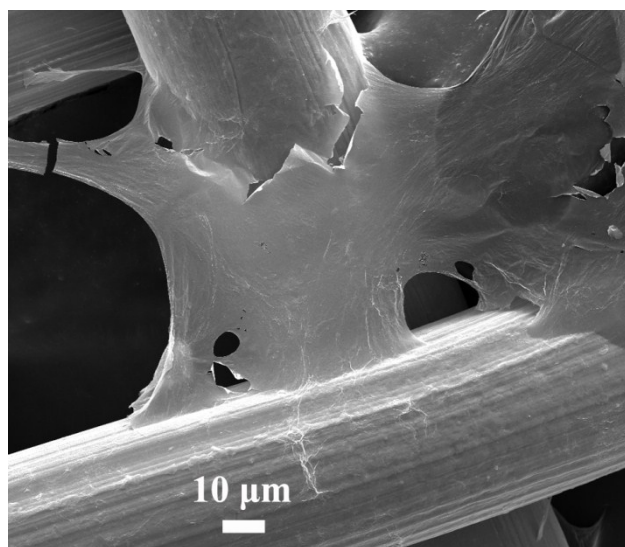

Fig. S1 The SEM image of the rGO modified SS.

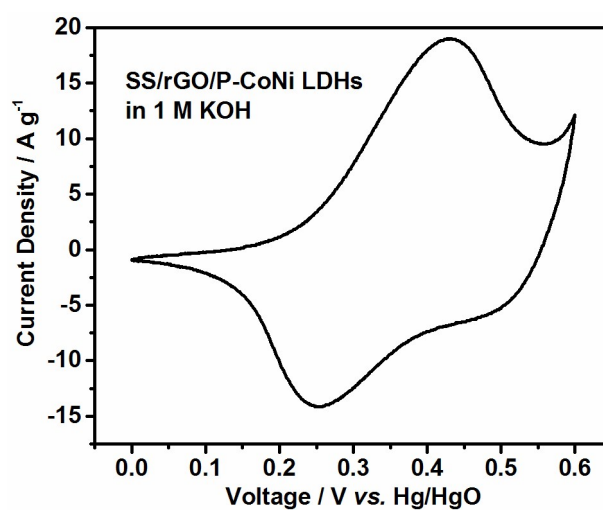

Fig S2. The CV curves of SS/rGO/P-CoNi LDHs in 1 M KOH without 0.5 M methanol at scan rate of 10 mV s<sup>-1</sup>.

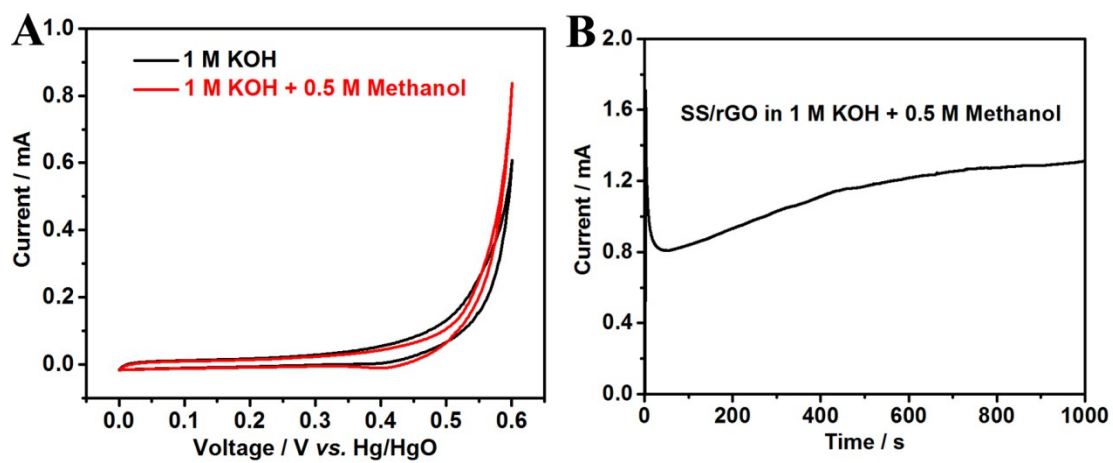

Fig. S3 (A) is the CV curves of SS/rGO in 1 M KOH with (red) and without (black) 0.5 M methanol at scan rate of  $10 \text{ mV s}^{-1}$ . (B) is the CA curve of SS/rGO in 1 M KOH with 0.5 M methanol at 0.6 V.
